# Supplementary material for: Haloturbation in the northern Atacama Desert revealed by a hidden subsurface network of calcium sulphate wedges
Source: Copernicus journal article supplement (doi:10.5194/egusphere-2024-592), 2024-04-15
Supplement: Supplementary file 1 [file egusphere-2024-592-supplement.pdf]

# Supplementary Material

## Haloturbation in the northern Atacama Desert revealed by a hidden subsurface network of calcium sulphate wedges

Aline Zinelabedin<sup>1,2</sup>, Joel Mohren<sup>1,3</sup>, Maria Wierzbicka-Wieczorek<sup>1</sup>, Tibor J. Dunai<sup>1</sup>, Stefan Heinze<sup>4</sup>  
Benedikt Ritter<sup>1</sup>

<sup>1</sup>Institute of Geology and Mineralogy, University of Cologne, Zùlpicher Str. 49b, 50674 Cologne, Germany

<sup>2</sup>Institute of Geography, University of Cologne, Zùlpicher Str. 45, 50674 Cologne, Germany

<sup>3</sup>Department of Geography, RWTH Aachen University, Wùllnerstr. 5b, 52062 Aachen, Germany

<sup>4</sup>Institute for Nuclear Physics, University of Cologne, Zùlpicher Str. 77, 50937 Cologne, Germany

Correspondence to: Aline Zinelabedin ([aline.zinelabedin@uni-koeln.de](mailto:aline.zinelabedin@uni-koeln.de))

### 1 Outcrop and shattered clast data

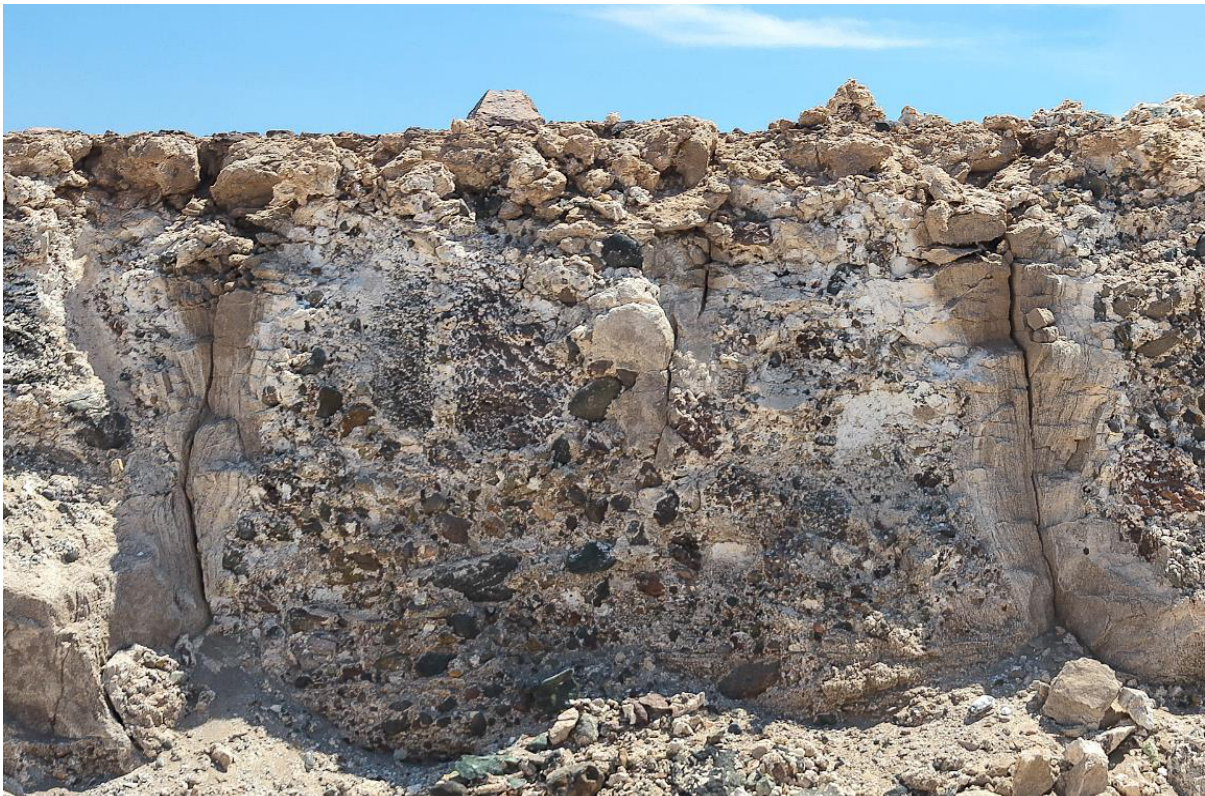

*Figure S.1: Close-up of trench wall showing main characteristic features of the outcrop.*

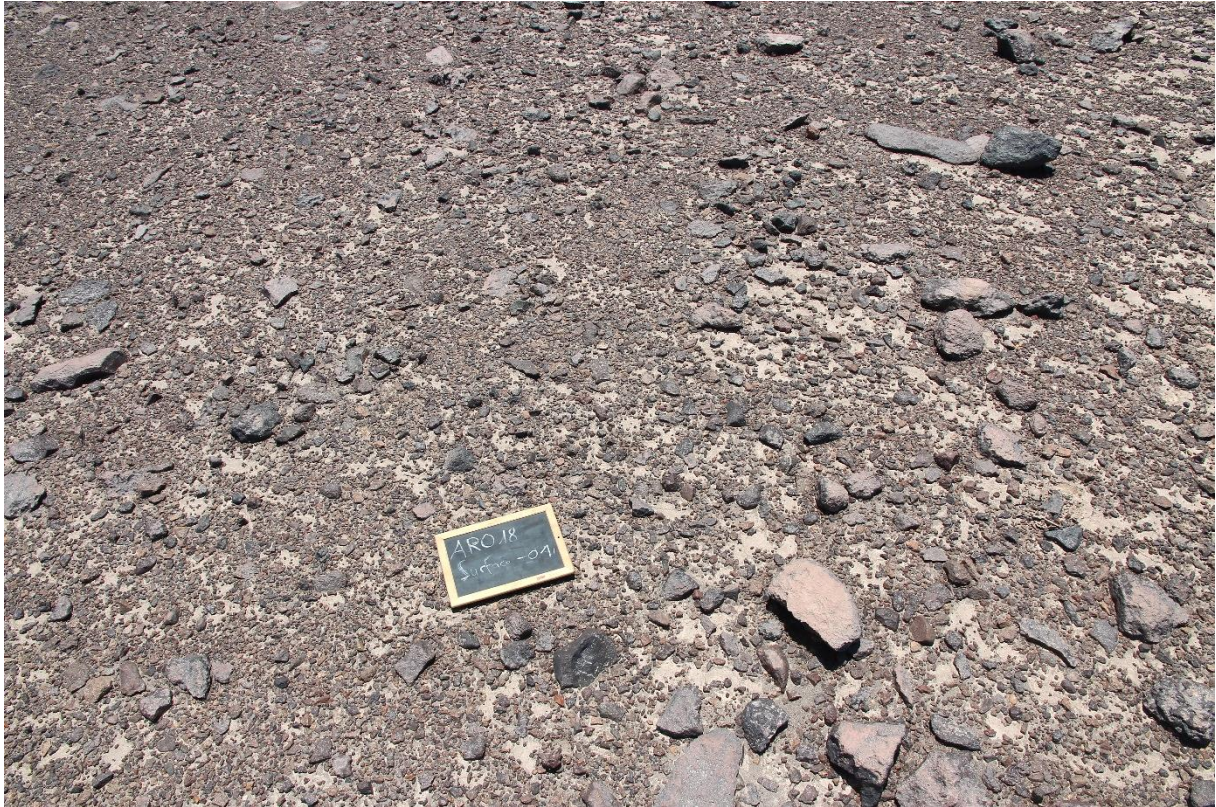

Figure S.2: Desert pavement on the outcrop surface at the Aroma fan site.

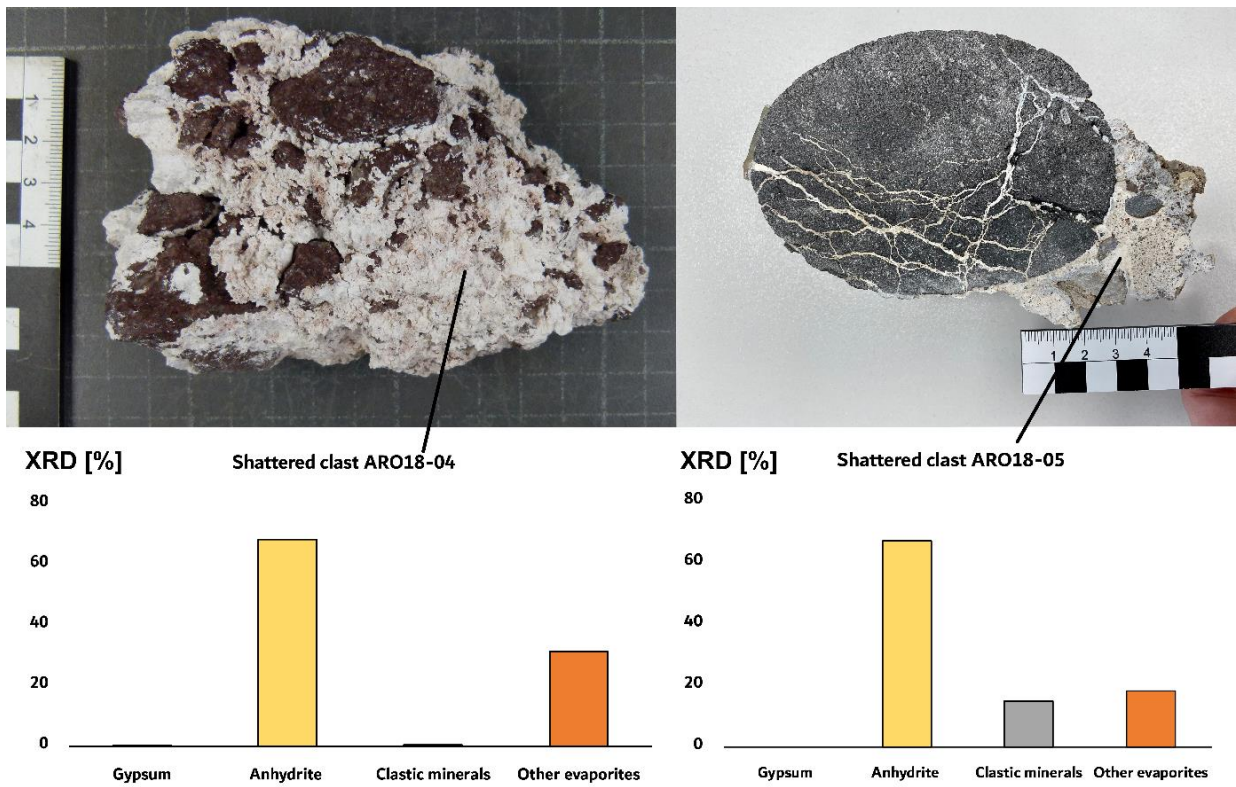

Figure S.3: Shattered clasts with calcium sulphate filling from the polygon body.

## 2 $^{21}\text{Ne}$ data

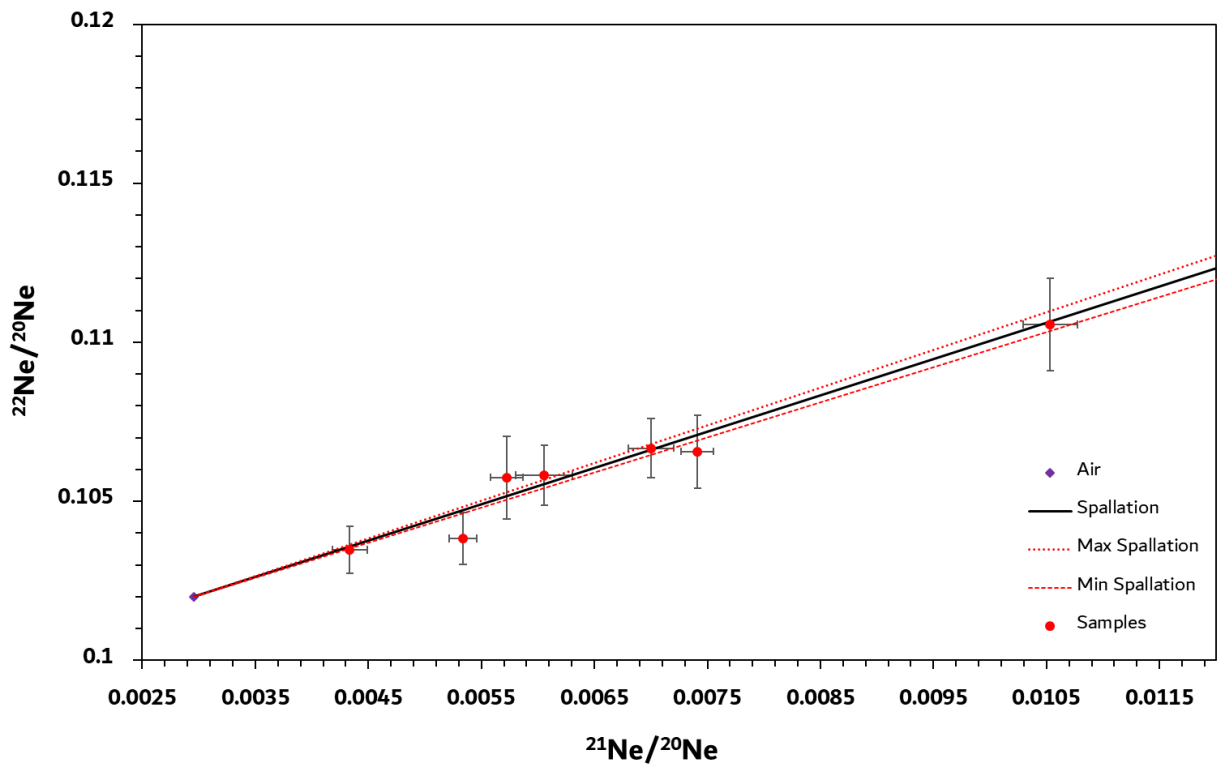

Figure S.4: Neon triple isotope diagram. The black points are the six analysed surface quartz clasts ARO17-01A–F including the CREU1 standard (Vermeesch et al., 2015). The red and black spallogenic lines represent the mixture of air and the spallogenic end member. Error bars are  $1\sigma$ .

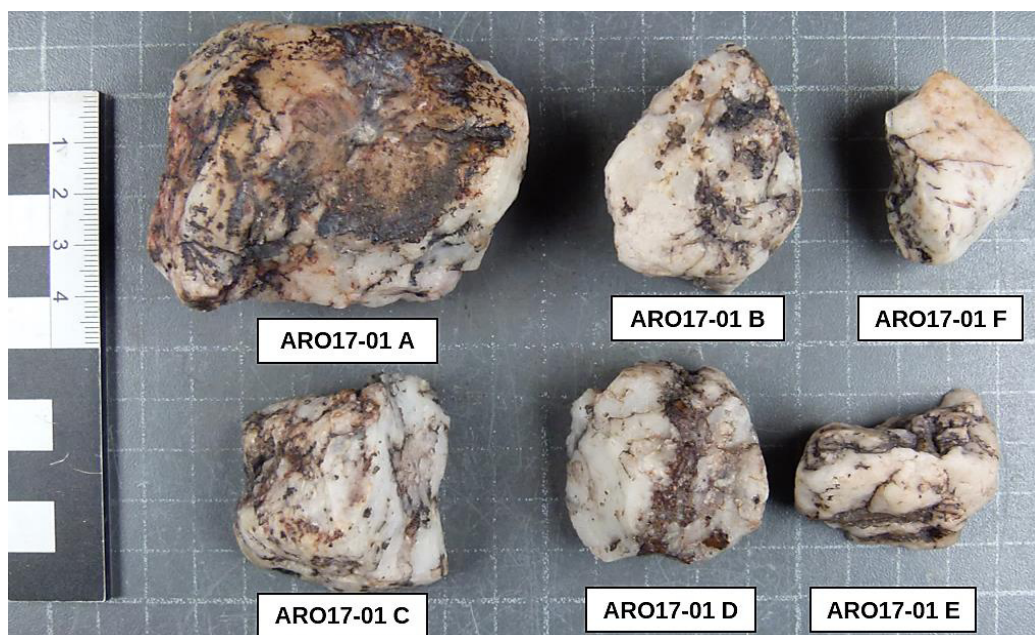

Figure S.5: Six surface quartz clasts for  $^{21}\text{Ne}$  exposure dating from the surface nearby the Aroma fan outcrop.

Table S.1: Neon-isotope ratios of surface clasts and standard data for the neon triple isotope diagram.

| Sample ID | Cologne Noble Gas ID | 20Ne        | d 20Ne      | 22/20       | d 22/20     | d 22/20 % | 21CDD /20   | d 21CDD/20  | d 21/20 % | 21Ne ex atoms/gr     |                      |      |
|-----------|----------------------|-------------|-------------|-------------|-------------|-----------|-------------|-------------|-----------|----------------------|----------------------|------|
|           |                      | atoms/g     | atoms/g     | Measured    | Measured    | d%        | Measured    | Measured    | d%        | atoms/gr             | d                    | d%   |
| CREU1     | CGN0050              | 44803661018 | 718477516.3 | 0.110555846 | 0.001448521 | 1.3%      | 0.010533    | 0.000240    | 2.3%      | 3.39x10 <sup>6</sup> | 9.91x10 <sup>6</sup> | 2.9% |
| ARO17-01A | CGN0065              | 41081406779 | 726014584.8 | 0.106563781 | 0.001147927 | 1.1%      | 0.007412    | 0.000143    | 1.9%      | 1.83x10 <sup>6</sup> | 4.87x10 <sup>6</sup> | 2.7% |
| ARO17-01B | CGN0066              | 74909489207 | 1576581969  | 0.103830648 | 0.000816008 | 0.8%      | 0.005336    | 0.000125    | 2.3%      | 1.78x10 <sup>6</sup> | 5.67x10 <sup>6</sup> | 3.2% |
| ARO17-01C | CGN0067              | 58621031889 | 2353982981  | 0.10581425  | 0.000940202 | 0.9%      | 0.006056    | 0.000249    | 4.1%      | 1.82x10 <sup>6</sup> | 1.05x10 <sup>7</sup> | 5.8% |
| ARO17-01D | CGN0068              | 54288772805 | 1530907210  | 0.106670913 | 0.000933514 | 0.9%      | 0.007001    | 0.000204    | 2.9%      | 2.19x10 <sup>6</sup> | 8.96x10 <sup>6</sup> | 4.1% |
| ARO17-01E | CGN0069              | 60793967653 | 1518185161  | 0.105749455 | 0.001302841 | 1.2%      | 0.005725    | 0.000145    | 2.5%      | 1.68x10 <sup>6</sup> | 6.04x10 <sup>6</sup> | 3.6% |
| ARO17-01F | CGN0070              | 96218172047 | 3213967854  | 0.103473064 | 0.000745307 | 0.7%      | 0.004335505 | 0.000152137 | 3.5%      | 1.33x10 <sup>6</sup> | 6.45x10 <sup>6</sup> | 4.9% |

Table S.2: Calculated <sup>21</sup>Ne exposure ages of the surface quartz clasts ARO17-01A–F from the CRONUS-Earth online calculator (Balco et al., 2008) for exposure ages based on scaling scheme LSD<sub>n</sub> (Lifton et al., 2014) and calculation parameters.

| Sample ID   | Calculation parameters |                      |                     |                  |                      |                                     | Scaling LSD <sub>n</sub> Lifton et al. (2014) |                     | Scaling Stone (2000) |                     | Deviation between LSD <sub>n</sub> and Stone scaling |
|-------------|------------------------|----------------------|---------------------|------------------|----------------------|-------------------------------------|-----------------------------------------------|---------------------|----------------------|---------------------|------------------------------------------------------|
|             | Coordinates            | Elevation [m a.s.l.] | Erosion rate (cm/a) | Shielding factor | Clast thickness [cm] | Sample density [g/cm <sup>3</sup> ] | Age [Ma]                                      | External error [Ma] | Age [Ma]             | External error [Ma] | [%]                                                  |
| ARO17-01A   | 19°39'34"S, 69°35'51"W | 1627                 | 0 (unknown)         | 1                | 3                    | 2.65                                | 4.51                                          | 0.37                | 5.61                 | 0.46                | 24.37                                                |
| ARO17-01B   | 19°39'34"S, 69°35'51"W | 1627                 | 0 (unknown)         | 1                | 2.6                  | 2.65                                | 4.36                                          | 0.36                | 5.43                 | 0.45                | 24.2                                                 |
| ARO17-01C   | 19°39'34"S, 69°35'51"W | 1627                 | 0 (unknown)         | 1                | 2.8                  | 2.65                                | 4.51                                          | 0.37                | 5.61                 | 0.46                | 24.37                                                |
| ARO17-01D   | 19°39'34"S, 69°35'51"W | 1627                 | 0 (unknown)         | 1                | 1.4                  | 2.65                                | 5.36                                          | 0.44                | 6.63                 | 0.54                | 23.71                                                |
| ARO17-01E   | 19°39'34"S, 69°35'51"W | 1627                 | 0 (unknown)         | 1                | 1.6                  | 2.65                                | 3.4                                           | 0.32                | 4.99                 | 0.41                | 24.92                                                |
| ARO17-01F   | 19°39'34"S, 69°35'51"W | 1627                 | 0 (unknown)         | 1                | 1.6                  | 2.65                                | 3.27                                          | 0.29                | 4.13                 | 0.36                | 25.97                                                |
| <b>Mean</b> |                        |                      |                     |                  |                      |                                     | <b>4.34</b>                                   | <b>0.36</b>         | <b>5.40</b>          | <b>0.45</b>         | <b>24.64</b>                                         |

### 3 ICP-OES data

Table S.3: ICP-OES element concentration in mol/l.

| ICP Sample ID           | Dilution factor | Cl-line 134.724 | Na-line 589.592 |
|-------------------------|-----------------|-----------------|-----------------|
| <b>Surface crust</b>    |                 |                 |                 |
| ARO18-02-001            | 100             | 0               | 0               |
| ARO18-02-002            | 100             | 0               | 0               |
| ARO18-02-002A           | 100             | 0               | 0               |
| ARO18-02-003A           | 100             | 0               | 0               |
| ARO18-02-004            | 100             | 0               | 0               |
| ARO18-02-005            | 100             | 0               | 0               |
| ARO18-02-006            | 100             | 0               | 0               |
| ARO18-02-007            | 100             | 0               | 0.77            |
| <b>Shattered clasts</b> |                 |                 |                 |
| ARO18-02-04             | 100             | 0               | 0               |
| ARO18-02-05             | 100             | 0.68            | 1.46            |
| <b>Subsurface wedge</b> |                 |                 |                 |
| ARO18-08-LP1            | 100             | 0               | 0.97            |
| ARO18-08-LP2            | 100             | 0               | 1.07            |
| ARO18-08-LP3            | 100             | 0               | 1.13            |
| ARO18-08-LP4            | 100             | 0.44            | 1.31            |
| ARO18-08-LP5            | 100             | 0.36            | 1.21            |
| ARO18-08-LP6            | 100             | 0.50            | 1.40            |
| ARO18-08-LP7            | 100             | 0.75            | 1.71            |
| ARO18-08-LP8            | 100             | 0.34            | 1.32            |
| ARO18-08-LP9            | 100             | 0.34            | 1.35            |
| ARO18-08-LP10           | 100             | 0.42            | 1.44            |
| ARO18-08-RP1            | 100             | 0               | 1.15            |
| ARO18-08-RP2            | 100             | 0               | 1.32            |
| ARO18-08-RP3            | 100             | 0               | 0.95            |
| ARO18-08-RP4            | 100             | 0               | 0.96            |
| ARO18-08-RP5            | 100             | 0.60            | 1.17            |
| ARO18-08-RP6            | 100             | 0.70            | 1.09            |
| ARO18-08-RP7            | 100             | 0               | 0               |
| ARO18-08-RP8            | 100             | 0               | 0               |
| ARO18-08-RP9            | 100             | 0               | 0               |
| ARO18-08-RP10           | 100             | 0               | 0               |

## 4 XRD data

Table S.4: XRD results (individual phases) of wedge, crust, and shattered clast subsamples.

| Sample                  | Goodness of fit (GOF) value | Gypsum | Anhydrite | Aluminite | Konyaite | Halite | Quartz | Albite | Anorthite | Hornblende | Pargasite | Muscovite | Dolomite | Arcanite | Othoclase | Fluoro-riebeckite | Amarantite | Labradorite | Peretaite | Ramsbeckite | Alunogen |
|-------------------------|-----------------------------|--------|-----------|-----------|----------|--------|--------|--------|-----------|------------|-----------|-----------|----------|----------|-----------|-------------------|------------|-------------|-----------|-------------|----------|
| <b>Surface crust</b>    |                             |        |           |           |          |        |        |        |           |            |           |           |          |          |           |                   |            |             |           |             |          |
| ARO18-02-001            | 2.16                        | 0.78   | -         | 35.41     | -        | -      | 7.42   | 12.02  | 6.34      | 10.09      | -         | 8.17      | -        | -        | 6.88      | -                 | -          | 0.42        | -         | 8.05        | 4.43     |
| ARO18-02-002            | 2.06                        | 87.81  | 0.52      | 0.96      | -        | -      | 4.53   | 6.17   | -         | -          | -         | -         | -        | -        | -         | -                 | -          | -           | -         | -           | -        |
| ARO18-02-002A           | 2.21                        | 91.9   | 1.04      | 0.49      | -        | -      | 2.86   | 3.7    | -         | -          | -         | -         | -        | -        | -         | -                 | -          | -           | -         | -           | -        |
| ARO18-02-003A           | 2.04                        | 92.24  | 1.72      | -         | 1.52     | -      | 2.55   | 1.97   | -         | -          | -         | -         | -        | -        | -         | -                 | -          | -           | -         | -           | -        |
| ARO18-02-004A           | 2.18                        | 87.06  | 1.76      | -         | -        | -      | 7.84   | 3.34   | -         | -          | -         | -         | -        | -        | -         | -                 | -          | -           | -         | -           | -        |
| ARO18-02-005            | 1.85                        | 94.84  | 2.17      | -         | -        | -      | 2.13   | 0.86   | -         | -          | -         | -         | -        | -        | -         | -                 | -          | -           | -         | -           | -        |
| ARO18-02-006            | 2.10                        | 91.4   | 3.53      | -         | -        | -      | 2.44   | 2.63   | -         | -          | -         | -         | -        | -        | -         | -                 | -          | -           | -         | -           | -        |
| ARO18-02-007            | 1.91                        | 72.6   | 23.93     | -         | 1.21     | -      | 1.83   | 0.43   | -         | -          | -         | -         | -        | -        | -         | -                 | -          | -           | -         | -           | -        |
| <b>Subsurface wedge</b> |                             |        |           |           |          |        |        |        |           |            |           |           |          |          |           |                   |            |             |           |             |          |
| ARO18-08-RP1            | 2.20                        | 0.6    | 62.72     | 3.17      | -        | -      | 5.26   | 16.74  | -         | -          | 1.55      | 9.56      | -        | -        | -         | -                 | 0.41       | -           | -         | -           | -        |
| ARO18-08-RP2            | 2.12                        | 0.9    | 41.6      | 0.77      | -        | -      | 9.41   | 40.78  | -         | -          | 2.88      | 3.66      | -        | -        | -         | -                 | -          | -           | -         | -           | -        |
| ARO18-08-RP3            | 2.58                        | 0.42   | 51.25     | -         | -        | -      | 9.06   | 33.22  | 2.83      | -          | 1.02      | 2.19      | -        | -        | -         | -                 | -          | -           | -         | -           | -        |
| ARO18-08-RP4            | 2.40                        | 2.87   | 40.02     | -         | -        | -      | 7.83   | 29.19  | 15.67     | -          | 3.05      | 1.58      | -        | -        | -         | -                 | -          | -           | -         | -           | -        |
| ARO18-08-RP5            | 2.13                        | 0.05   | 46.4      | 4.44      | -        | -      | 7.17   | 28.8   | -         | -          | 0.07      | 13.06     | -        | -        | -         | -                 | -          | -           | -         | -           | -        |
| ARO18-08-RP6            | 2.34                        | 0.31   | 53.64     | -         | -        | -      | 8.42   | 17.61  | 0.31      | -          | 0.32      | 1.71      | -        | -        | 5.97      | 0.21              | -          | 11.51       | -         | -           | -        |
| ARO18-08-RP7            | 2.43                        | 0.28   | 53.14     | -         | -        | -      | 3.69   | 35.99  | -         | -          | 0         | 6.82      | -        | -        | -         | -                 | -          | -           | 0.06      | -           | -        |
| ARO18-08-RP8            | 2.42                        | 16.69  | 32.8      | -         | -        | -      | 6.69   | 28.5   | 8.76      | -          | 1.01      | 0.84      | -        | -        | 4.64      | 0.07              | -          | -           | -         | -           | -        |
| ARO18-08-RP9            | 2.99                        | 40.59  | 3.04      | 0.8       | -        | -      | 5.51   | 22.64  | 15.69     | -          | 5.55      | 3.13      | -        | -        | 2.44      | 0.57              | -          | -           | -         | -           | -        |
| ARO18-08-RP10           | 2.99                        | 39.8   | 2.98      | 0.76      | -        | -      | 5.68   | 24.29  | 15.46     | -          | 5.6       | 3.13      | -        | -        | 1.74      | 0.55              | -          | -           | -         | -           | -        |
| ARO18-08-LP1            | 2.19                        | -      | 49.75     | 0.06      | -        | -      | 5.56   | 34.75  | 0.2       | 0.89       | 0.04      | 8.77      | -        | -        | -         | -                 | -          | -           | -         | -           | -        |
| ARO18-08-LP2            | 1.96                        | -      | 65.59     | -         | -        | -      | 7.28   | 23.58  | 0.28      | 1.62       | -         | -         | 0.36     | 1.3      | -         | -                 | -          | -           | -         | -           | -        |
| ARO18-08-LP3            | 2.04                        | -      | 68.04     | 2.8       | -        | -      | 6.05   | 5.28   | 12.05     | 1.64       | -         | 4.14      | -        | -        | -         | -                 | -          | -           | -         | -           | -        |
| ARO18-08-LP4            | 2.18                        | -      | 73.49     | -         | -        | -      | 3.62   | 18.48  | 0.38      | 0.42       | -         | -         | -        | 0.1      | -         | -                 | -          | -           | -         | -           | -        |

|                         |      |      |       |       |      |      |       |       |       |      |   |   |   |   |       |      |   |   |   |   |   |
|-------------------------|------|------|-------|-------|------|------|-------|-------|-------|------|---|---|---|---|-------|------|---|---|---|---|---|
| ARO18-08-LP5            | 2.54 | -    | 49.33 | 0.7   | -    | -    | 8.56  | 8.52  | 17.17 | -    | - | - | - | - | 15.73 | -    | - | - | - | - | - |
| ARO18-08-LP6            | 2.06 | -    | 53.61 | 1.66  | -    | -    | 9.06  | 32.5  | 0.19  | -    | - | - | - | - | -     | 2.98 | - | - | - | - | - |
| ARO18-08-LP7            | 2.24 | -    | 71.56 | 1.92  | -    | -    | 8.95  | 17.55 | 0.02  | -    | - | - | - | - | -     | -    | - | - | - | - | - |
| ARO18-08-LP8            | 2.03 | -    | 50.07 | 1.02  | -    | -    | 10.25 | 37.45 | -     | 1.23 | - | - | - | - | -     | -    | - | - | - | - | - |
| ARO18-08-LP9            | 2.09 | -    | 58.88 | 0.35  | -    | -    | 8.77  | 31.67 | -     | 0.32 | - | - | - | - | -     | -    | - | - | - | - | - |
| ARO18-08-LP10           | 2.35 | -    | 68.9  | 1.18  | -    | -    | 5.66  | 19.45 | -     | 0.63 | - | - | - | - | 4.18  | -    | - | - | - | - | - |
| <b>Shattered clasts</b> |      |      |       |       |      |      |       |       |       |      |   |   |   |   |       |      |   |   |   |   |   |
| ARO18-04                | 2.17 | 0.09 | 68.23 | 30.39 | 0.81 | -    | -     | 0.48  | -     | -    | - | - | - | - | -     | -    | - | - | - | - | - |
| ARO18-05                | 2.62 | -    | 67.11 | 17.6  | -    | 0.54 | 9.4   | 5.36  | -     | -    | - | - | - | - | -     | -    | - | - | - | - | - |

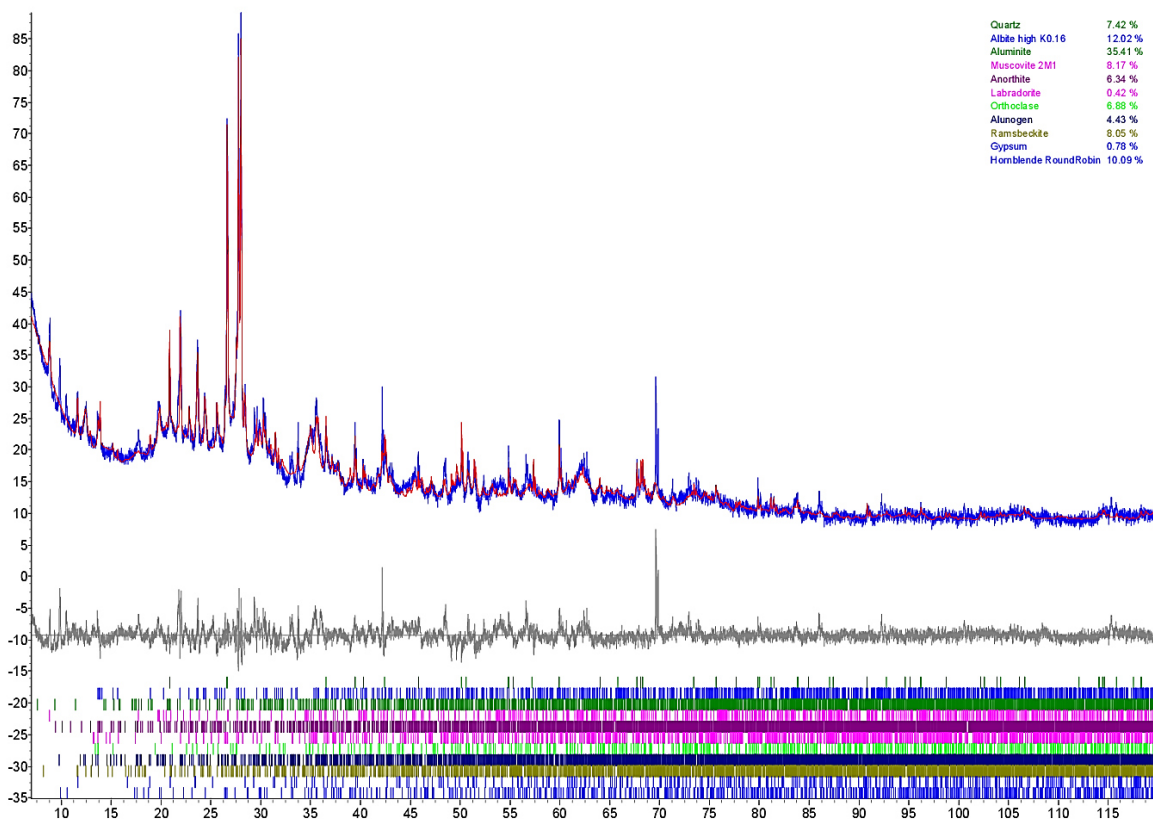

Figure S.6: XRD diffractogram of surface subsample ARO18-02-001 showing a high amount of aluminite.

## 5 Plutonium data

Table S.5:  $^{239}\text{Pu}$  data of surface crust subsamples.

| Sample ID <sup>a</sup> | Depth<br>b.s. | Batch ID | Mass<br>(g) | Carrier mass     |   |        | $^{239}\text{Pu}/^{242}\text{Pu}$ |   |      | Blank<br>subtraction<br>$^{239}\text{Pu}$ (%) | $^{239}\text{Pu}$ specific<br>activity<br>(mBq kg <sup>-1</sup> ) <sup>e</sup> |   |      |
|------------------------|---------------|----------|-------------|------------------|---|--------|-----------------------------------|---|------|-----------------------------------------------|--------------------------------------------------------------------------------|---|------|
|                        |               |          |             | (g) <sup>c</sup> |   |        | (x10 <sup>-3</sup> ) <sup>d</sup> |   |      |                                               | (mBq kg <sup>-1</sup> ) <sup>e</sup>                                           |   |      |
| ARO18-02-001           | 0             | Col22-1  | 20.49       | 0.2291           | ± | 0.0001 | 11.75                             | ± | 0.35 | 1.7                                           | 6.48                                                                           | ± | 0.20 |
| ARO18-02-TC2           | 0             | Col23-3  | 20.73       | 0.2302           | ± | 0.0001 | 11.66                             | ± | 0.41 | 6.2                                           | 6.09                                                                           | ± | 0.23 |
| ARO18-02/Pu2           | 0-1.5         | Col22-1  | 11.57       | 0.2301           | ± | 0.0001 | 0.61                              | ± | 0.07 | 32.8                                          | 0.41                                                                           | ± | 0.08 |
| ARO18-02/Pu3           | 1.5-3         | Col23-2  | 9.22        | 0.2308           | ± | 0.0001 | 1.32                              | ± | 0.10 | 52.5                                          | 0.78                                                                           | ± | 0.16 |
| ARO18-02/Pu4           | 3-4.5         | Col22-1  | 7.46        | 0.2306           | ± | 0.0001 | 0.97                              | ± | 0.09 | 20.5                                          | 1.19                                                                           | ± | 0.15 |
| ARO18-02/Pu5           | ~10           | Col22-1  | 4.25        | 0.2301           | ± | 0.0001 | 3.40                              | ± | 0.21 | 5.9                                           | 8.68                                                                           | ± | 0.59 |

<sup>a</sup> All samples taken at 19° 39'34.02"S, 69° 35' 51.4"W

<sup>b</sup> Depth below the top crust surface



<sup>c</sup> <sup>242</sup>Pu carrier solution concentration 22.13 ppt

<sup>d</sup> Ratios measured by CologneAMS with 1σ measurement uncertainties

<sup>e</sup> After blank correction with propagated 1σ uncertainties

Table S.6: <sup>240</sup>Pu data of surface crust subsample ARO18-02-TC2.

| Sample ID    | Depth b.s. (cm) <sup>a</sup> | Batch ID | Mass (g) | Carrier mass (g) <sup>b</sup> |   |        | <sup>240</sup> Pu/ <sup>242</sup> Pu (x10 <sup>-3</sup> ) <sup>c</sup> |   |      | Blank subtraction <sup>240</sup> Pu (%) | <sup>240</sup> Pu specific activity (mBq kg <sup>-1</sup> ) <sup>d</sup> |   |      | <sup>240</sup> Pu/ <sup>239</sup> Pu (x10 <sup>-3</sup> ) <sup>d,e</sup> |   |       |
|--------------|------------------------------|----------|----------|-------------------------------|---|--------|------------------------------------------------------------------------|---|------|-----------------------------------------|--------------------------------------------------------------------------|---|------|--------------------------------------------------------------------------|---|-------|
|              |                              |          |          |                               |   |        |                                                                        |   |      |                                         |                                                                          |   |      |                                                                          |   |       |
| ARO18-02-TC2 | 0                            | Col23-3  | 20.73    | 0.2302                        | ± | 0.0001 | 2.59                                                                   | ± | 0.19 | 22.1                                    | 4.13                                                                     | ± | 0.41 | 0.185                                                                    | ± | 0.020 |

<sup>a</sup> Depth below crust surface

<sup>b</sup> <sup>242</sup>Pu carrier solution concentration 22.13 ppt

<sup>c</sup> Ratios measured by CologneAMS with 1σ uncertainties

<sup>d</sup> After blank correction with propagated 1σ uncertainties

<sup>e</sup> See main manuscript for <sup>239</sup>Pu data

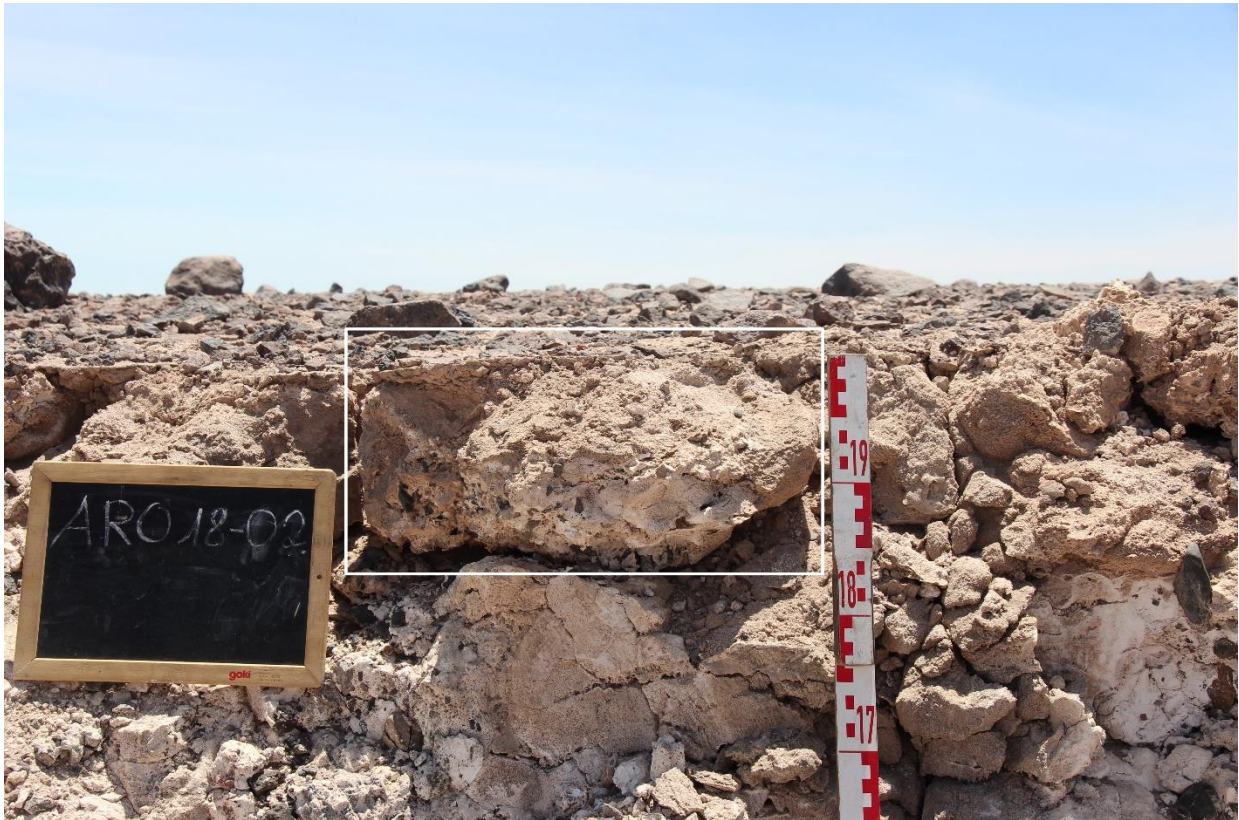

Figure S.7: Position of surface-crust sample in the outcrop (white box). Surface-crust subsample ARO18-02 is a crust block taken as a part of this pristine surface-crust sample marked with the white box.

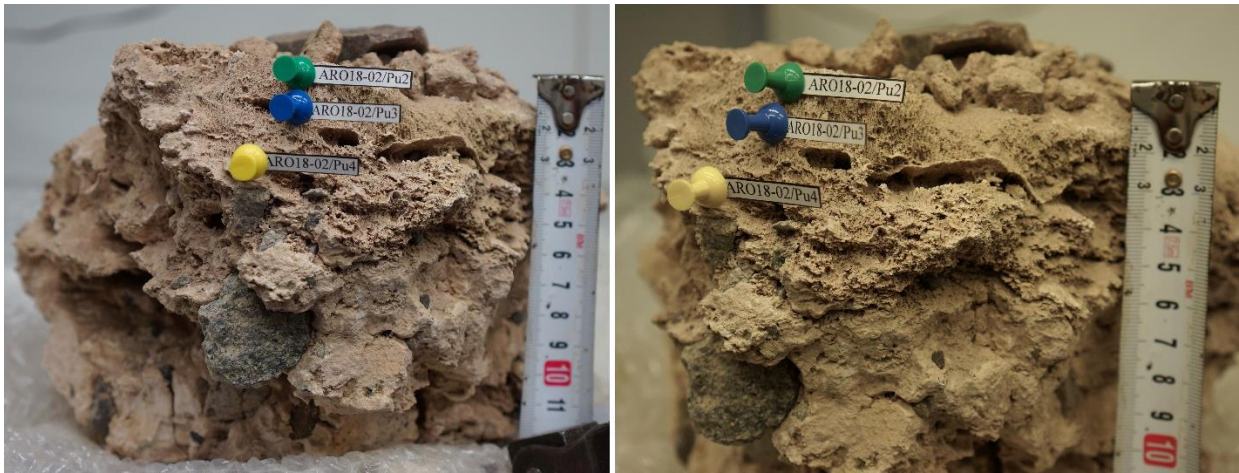

Figure S.8: Two photos of surface-crust subsample block ARO18-02 and markers of Pu subsamples positions of subsamples ARO18-02/Pu2, 3, 4. Samples ARO18-02-001 and the replicate sample ARO18-02-TC2 were taken from the top surface of the crust block.

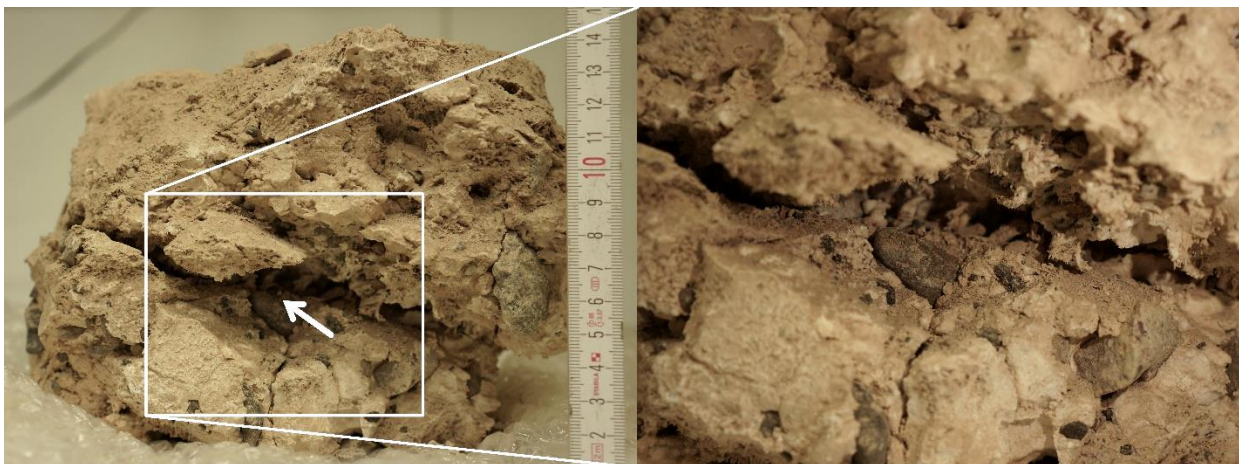

Figure S.9: Left: Photo of crust crack where the Pu subsample ARO18-02/Pu5 was subsampled. Right: close-up of the crack.

## 6 Sample pucks for SEM analysis

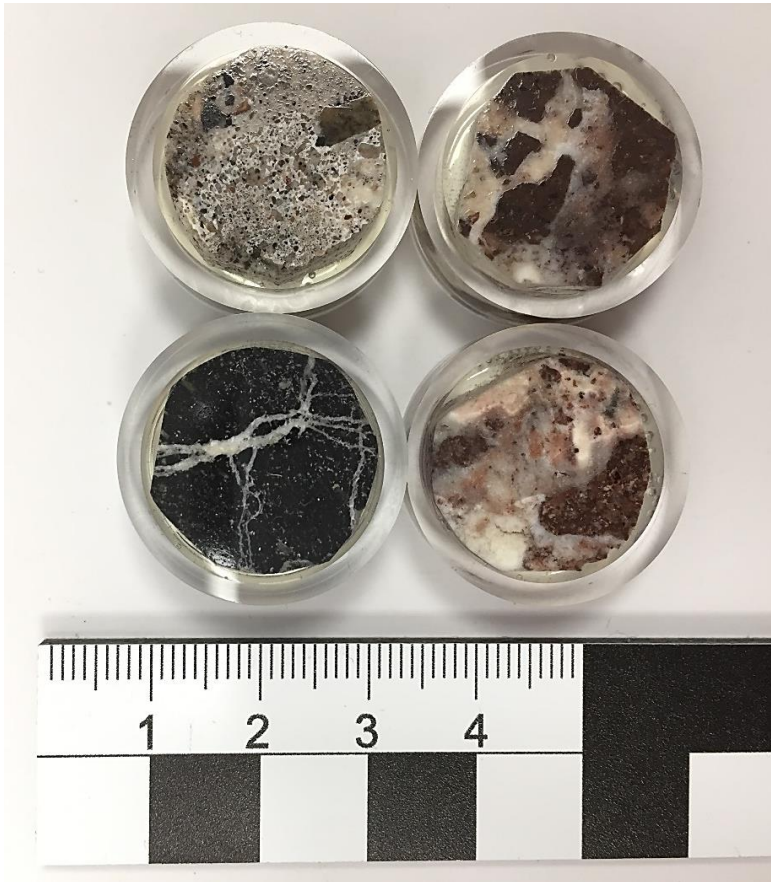

Figure S.10: Sample pucks of shattered clast samples (with salt filling) for SEM imagery. All samples are embedded in epoxy resin.

## 7 Photogrammetry

### Methodology

For a comprehensive description of digitalising objects using a lightbox setup see e. g. Leménager et al. (2023). The camera (Sony Alpha NEX-7, 24.3 mega pixels) was mounted on a tripod and images were taken at a distance of  $\sim 30$  cm (ARO17-03A) and  $\sim 45$  cm (ARO18-02) between the camera lens (Sony SEL35F18, 54 mm full format equivalent f/1.8 fixed-focal-length lens) and the specimen. During each run, the turntable horizontally rotated the specimen by 360 degrees. During image acquisition of sample ARO17-03A, four scale bars were photographed together with the specimen. The sample was turned upside down and pictured in four runs ( $\sim 40$  pictures per run, camera tilted by  $\sim 45^\circ$ ) to ensure sufficient image coverage per specimen surface area (for basic principles of structure for motion multiview stereopsis (SfM-MVS) photogrammetry method see e. g. Luhmann et al. 2010). The more fragile crust block sample ARO18-02 could not be turned upside down and was thus photographed from two different camera positions ( $\sim 45^\circ$  and  $\sim 10^\circ$

camera tilt) with a total picture count of 97. Scaling of the 3D model was achieved by measuring the spatial distances between five distinct features appearing on the crust's surface using a calliper. The image datasets were subsequently processed using Agisoft Metashape Professional Software (ver. 1.7.5). The reconstruction quality was improved by adopting the point cloud optimisation procedures suggested by Over et al. (2021).

*Table S.7: Photogrammetry data of surface crust and wedge sample.*

| Sample ID                                                                               | Mass (g) |   |      | Volume (cm <sup>3</sup> ) <sup>a</sup> |   |       | Density (g cm <sup>-3</sup> ) |   |      |
|-----------------------------------------------------------------------------------------|----------|---|------|----------------------------------------|---|-------|-------------------------------|---|------|
| ARO17-03A                                                                               | 278.74   | ± | 0.01 | 166.02                                 | ± | 3.87  | 1.68                          | ± | 0.04 |
| ARO18-02                                                                                | 4031.0   | ± | 0.5  | 3014.29                                | ± | 70.24 | 1.34                          | ± | 0.03 |
| <sup>a</sup> Volume uncertainties empirically derived (cf. Mohren et al. 2020b).        |          |   |      |                                        |   |       |                               |   |      |
| <sup>b</sup> Lower level of precision ignored in calculations (cf. Mohren et al, 2020b) |          |   |      |                                        |   |       |                               |   |      |

# CoISfM4-ARO17-03A

Processing Report  
18 May 2023

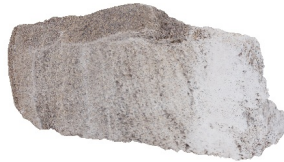

# Survey Data

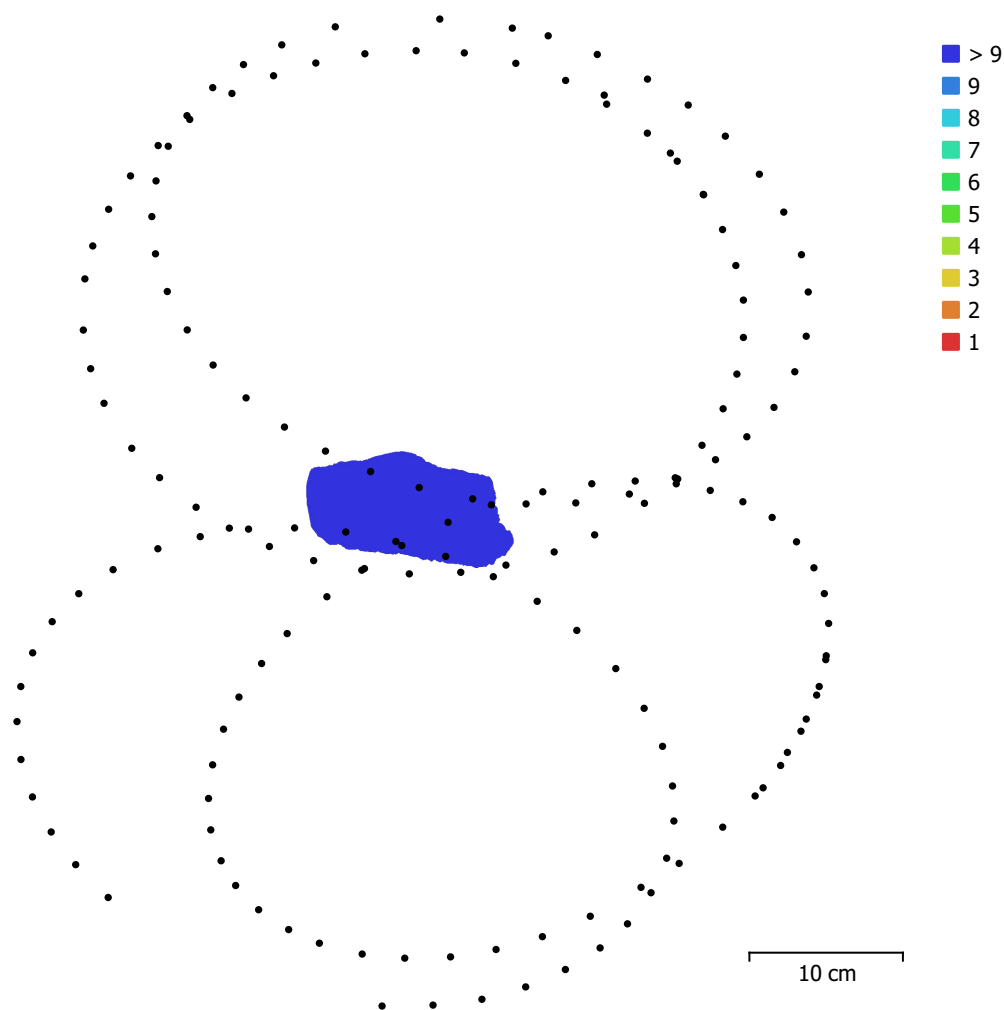

Fig. 1. Camera locations and image overlap.

|                    |                      |                     |           |
|--------------------|----------------------|---------------------|-----------|
| Number of images:  | 165                  | Camera stations:    | 165       |
| Flying altitude:   | 28.2 cm              | Tie points:         | 54,674    |
| Ground resolution: | 0.0289 mm/pix        | Projections:        | 243,037   |
| Coverage area:     | 74.6 cm <sup>2</sup> | Reprojection error: | 0.334 pix |

| Camera Model             | Resolution  | Focal Length | Pixel Size     | Precalibrated |
|--------------------------|-------------|--------------|----------------|---------------|
| NEX-7, E 35mm F1.8 OS... | 6000 x 4000 | 35 mm        | 4.04 x 4.04 μm | No            |

Table 1. Cameras.

# Camera Calibration

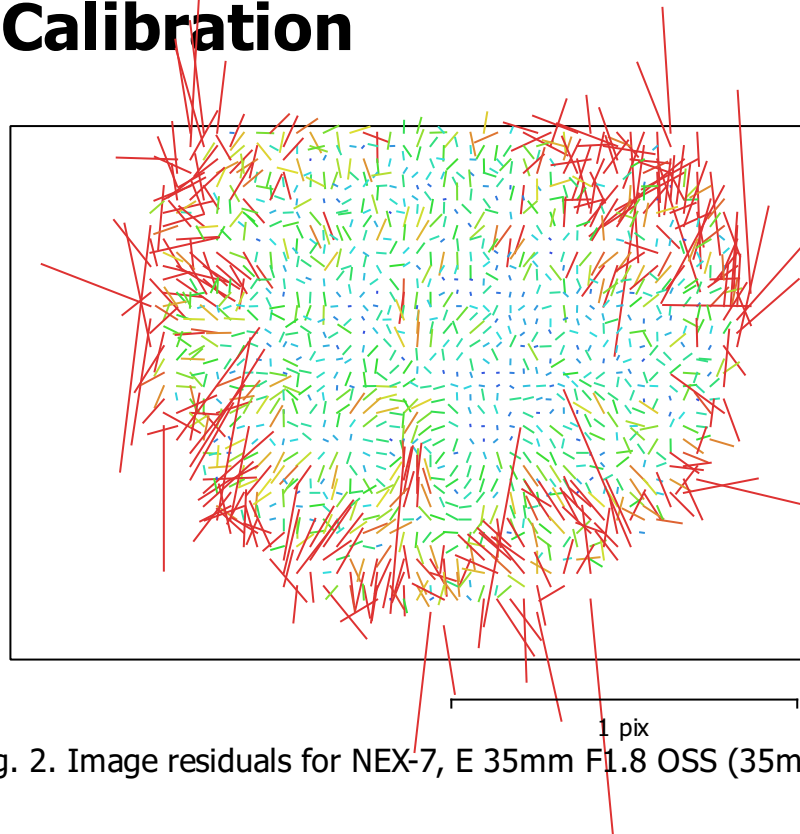

Fig. 2. Image residuals for NEX-7, E 35mm F1.8 OSS (35mm).

## NEX-7, E 35mm F1.8 OSS (35mm)

165 images

|              |                    |              |                       |
|--------------|--------------------|--------------|-----------------------|
| Type         | Resolution         | Focal Length | Pixel Size            |
| <b>Frame</b> | <b>6000 x 4000</b> | <b>35 mm</b> | <b>4.04 x 4.04 μm</b> |

|           | Value             | Error   | F    | Cx    | Cy    | K1    | K2    | K3    | P1    | P2    |
|-----------|-------------------|---------|------|-------|-------|-------|-------|-------|-------|-------|
| <b>F</b>  | <b>9772.35</b>    | 0.93    | 1.00 | -0.06 | -0.22 | -0.23 | 0.09  | -0.10 | 0.06  | -0.33 |
| <b>Cx</b> | <b>-9.43975</b>   | 1.1     |      | 1.00  | 0.01  | 0.16  | -0.14 | 0.13  | 0.94  | 0.14  |
| <b>Cy</b> | <b>-27.8747</b>   | 0.67    |      |       | 1.00  | -0.18 | -0.00 | 0.02  | 0.10  | 0.11  |
| <b>K1</b> | <b>0.0475383</b>  | 0.00078 |      |       |       | 1.00  | -0.81 | 0.75  | -0.01 | 0.46  |
| <b>K2</b> | <b>-0.137515</b>  | 0.021   |      |       |       |       | 1.00  | -0.97 | -0.14 | -0.02 |
| <b>K3</b> | <b>-1.05782</b>   | 0.21    |      |       |       |       |       | 1.00  | 0.12  | 0.05  |
| <b>P1</b> | <b>0.00140194</b> | 4.3e-05 |      |       |       |       |       |       | 1.00  | -0.13 |
| <b>P2</b> | <b>0.00110019</b> | 3.6e-05 |      |       |       |       |       |       |       | 1.00  |

Table 2. Calibration coefficients and correlation matrix.

# Scale Bars

| <b>Label</b>          | <b>Distance (m)</b> | <b>Error (m)</b>   |
|-----------------------|---------------------|--------------------|
| target 152_target 153 | 0.0500462           | 4.62156e-05        |
| target 154_target 155 | 0.0499802           | -1.9752e-05        |
| target 156_target 157 | 0.0499409           | -5.90828e-05       |
| target 158_target 159 | 0.0500325           | 3.24786e-05        |
| <b>Total</b>          |                     | <b>4.20466e-05</b> |

Table 3. Control scale bars.



# Digital Elevation Model

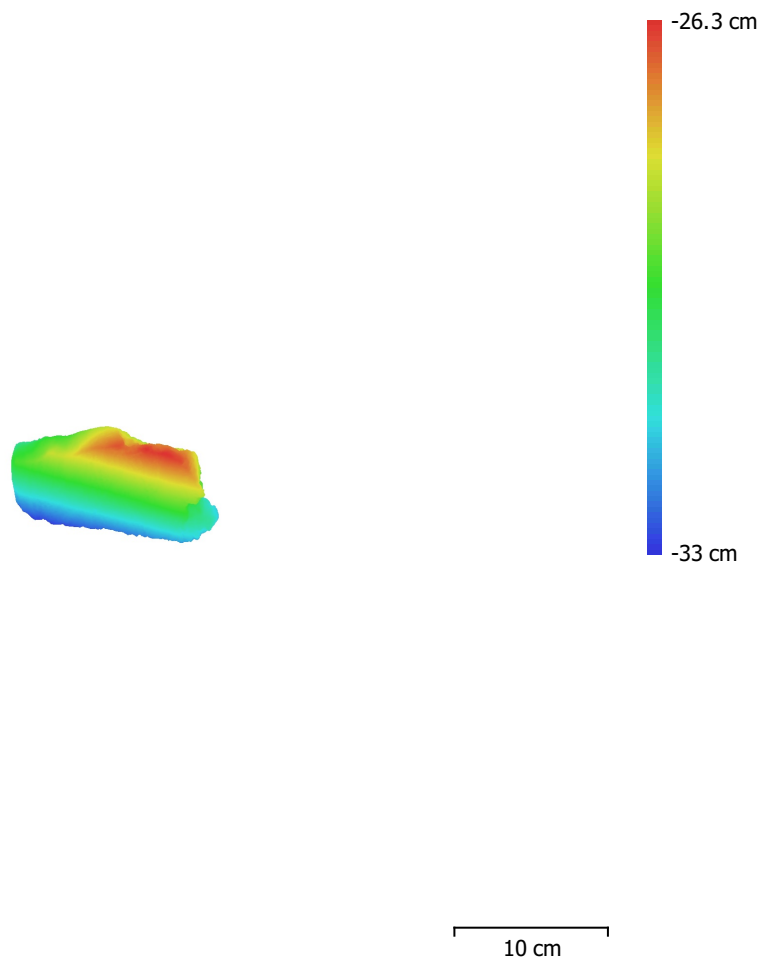

Fig. 3. Reconstructed digital elevation model.

Resolution: unknown  
Point density: unknown

# Processing Parameters

## General

|                   |                       |
|-------------------|-----------------------|
| Cameras           | 165                   |
| Aligned cameras   | 165                   |
| Markers           | 8                     |
| Scale bars        | 4                     |
| Coordinate system | Local Coordinates (m) |
| Rotation angles   | Yaw, Pitch, Roll      |

## Tie Points

|                                |                        |
|--------------------------------|------------------------|
| Points                         | 54,674 of 330,959      |
| RMS reprojection error         | 0.121736 (0.33424 pix) |
| Max reprojection error         | 0.407312 (1.79152 pix) |
| Mean key point size            | 2.67277 pix            |
| Point colors                   | 3 bands, uint8         |
| Key points                     | No                     |
| Average tie point multiplicity | 4.10099                |

## Alignment parameters

|                               |                     |
|-------------------------------|---------------------|
| Accuracy                      | High                |
| Generic preselection          | No                  |
| Reference preselection        | No                  |
| Key point limit               | 60,000              |
| Key point limit per Mpx       | 1,000               |
| Tie point limit               | 0                   |
| Exclude stationary tie points | Yes                 |
| Guided image matching         | No                  |
| Adaptive camera model fitting | No                  |
| Matching time                 | 3 hours 20 minutes  |
| Matching memory usage         | 2.08 GB             |
| Alignment time                | 3 minutes 6 seconds |
| Alignment memory usage        | 196.64 MB           |

## Optimization parameters

|                               |                          |
|-------------------------------|--------------------------|
| Parameters                    | f, cx, cy, k1-k3, p1, p2 |
| Adaptive camera model fitting | No                       |
| Optimization time             | 2 seconds                |
| Date created                  | 2022:12:16 16:46:04      |
| Software version              | 1.7.5.13229              |
| File size                     | 22.93 MB                 |

## Depth Maps

|       |     |
|-------|-----|
| Count | 164 |
|-------|-----|

## Depth maps generation parameters

|                  |                     |
|------------------|---------------------|
| Quality          | High                |
| Filtering mode   | Mild                |
| Max neighbors    | 40                  |
| Processing time  | 1 hours 15 minutes  |
| Memory usage     | 6.66 GB             |
| Date created     | 2022:12:16 18:23:26 |
| Software version | 1.7.5.13229         |
| File size        | 487.31 MB           |

## Point Cloud

|        |           |
|--------|-----------|
| Points | 7,371,440 |
|--------|-----------|

## Point attributes

|                                          |                                         |
|------------------------------------------|-----------------------------------------|
| Position                                 |                                         |
| Color                                    | 3 bands, uint8                          |
| Normal                                   |                                         |
| Confidence                               |                                         |
| <b>Point classes</b>                     |                                         |
| Created (never classified)               | 7,371,440                               |
| <b>Depth maps generation parameters</b>  |                                         |
| Quality                                  | High                                    |
| Filtering mode                           | Mild                                    |
| Max neighbors                            | 40                                      |
| Processing time                          | 1 hours 15 minutes                      |
| Memory usage                             | 6.66 GB                                 |
| <b>Point cloud generation parameters</b> |                                         |
| Processing time                          | 1 hours 27 minutes                      |
| Memory usage                             | 10.99 GB                                |
| Date created                             | 2022:12:16 19:51:07                     |
| Software version                         | 1.7.5.13229                             |
| File size                                | 148.36 MB                               |
| <b>Model</b>                             |                                         |
| Faces                                    | 100,000                                 |
| Vertices                                 | 50,002                                  |
| Vertex colors                            | 3 bands, uint8                          |
| Texture                                  | 16,384 x 16,384, 4 bands, uint8         |
| <b>Depth maps generation parameters</b>  |                                         |
| Quality                                  | High                                    |
| Filtering mode                           | Mild                                    |
| Max neighbors                            | 40                                      |
| Processing time                          | 1 hours 15 minutes                      |
| Memory usage                             | 6.66 GB                                 |
| <b>Reconstruction parameters</b>         |                                         |
| Surface type                             | Arbitrary                               |
| Source data                              | Point cloud                             |
| Interpolation                            | Enabled                                 |
| Strict volumetric masks                  | No                                      |
| Processing time                          | 4 minutes 57 seconds                    |
| Memory usage                             | 3.80 GB                                 |
| <b>Texturing parameters</b>              |                                         |
| Mapping mode                             | Generic                                 |
| Blending mode                            | Mosaic                                  |
| Texture size                             | 16,384                                  |
| Enable hole filling                      | Yes                                     |
| Enable ghosting filter                   | Yes                                     |
| UV mapping time                          | 23 seconds                              |
| UV mapping memory usage                  | 425.37 MB                               |
| Blending time                            | 19 minutes 24 seconds                   |
| Blending memory usage                    | 19.04 GB                                |
| Date created                             | 2022:12:17 12:35:33                     |
| Software version                         | 1.7.5.13229                             |
| File size                                | 180.41 MB                               |
| <b>System</b>                            |                                         |
| Software name                            | Agisoft Metashape Professional          |
| Software version                         | 2.0.0 build 15597                       |
| OS                                       | Windows 64 bit                          |
| RAM                                      | 63.90 GB                                |
| CPU                                      | Intel(R) Core(TM) i7-7700 CPU @ 3.60GHz |
| GPU(s)                                   | Quadro M4000                            |

# CoISfM3-ARO18-02

Processing Report  
18 May 2023

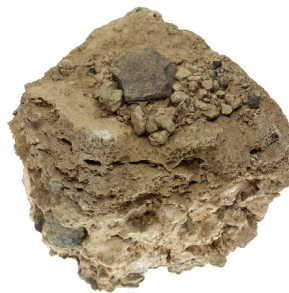

# Survey Data

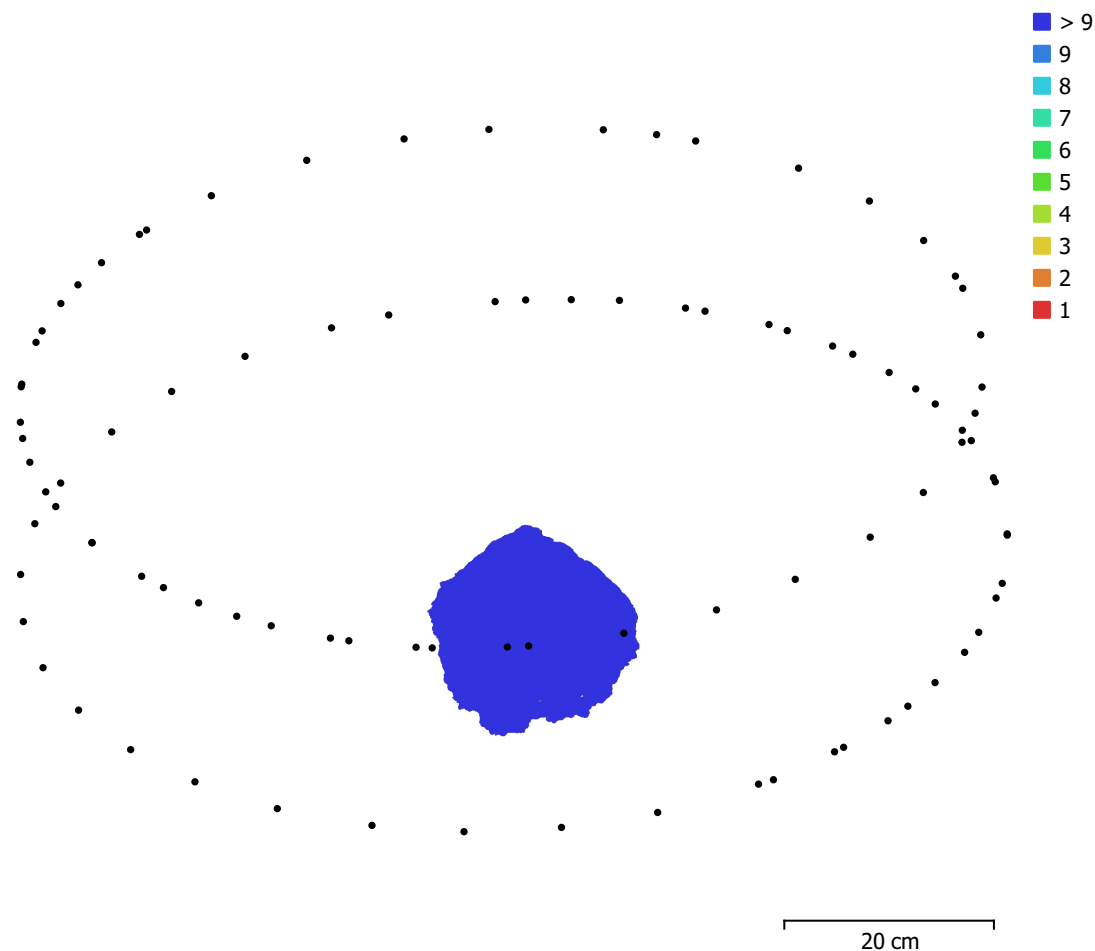

Fig. 1. Camera locations and image overlap.

|                    |                     |                     |           |
|--------------------|---------------------|---------------------|-----------|
| Number of images:  | 97                  | Camera stations:    | 96        |
| Flying altitude:   | 43.3 cm             | Tie points:         | 61,140    |
| Ground resolution: | 0.0455 mm/pix       | Projections:        | 236,418   |
| Coverage area:     | 279 cm <sup>2</sup> | Reprojection error: | 0.287 pix |

| Camera Model             | Resolution  | Focal Length | Pixel Size     | Precalibrated |
|--------------------------|-------------|--------------|----------------|---------------|
| NEX-7, E 35mm F1.8 OS... | 6000 x 4000 | 35 mm        | 4.04 x 4.04 μm | No            |

Table 1. Cameras.

# Camera Calibration

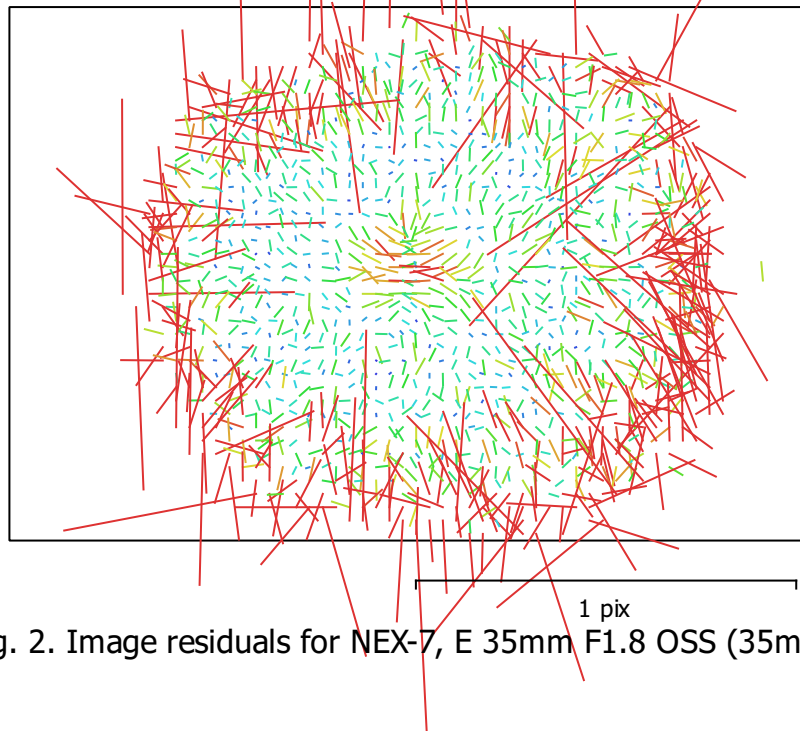

Fig. 2. Image residuals for NEX-7, E 35mm F1.8 OSS (35mm).

## NEX-7, E 35mm F1.8 OSS (35mm)

97 images

|              |                    |              |                       |
|--------------|--------------------|--------------|-----------------------|
| Type         | Resolution         | Focal Length | Pixel Size            |
| <b>Frame</b> | <b>6000 x 4000</b> | <b>35 mm</b> | <b>4.04 x 4.04 μm</b> |

|           | Value              | Error   | F    | Cx    | Cy    | K1    | K2    | K3    | P1    | P2    |
|-----------|--------------------|---------|------|-------|-------|-------|-------|-------|-------|-------|
| <b>F</b>  | <b>9518.77</b>     | 1.7     | 1.00 | -0.11 | -0.57 | -0.43 | -0.03 | 0.01  | -0.01 | -0.31 |
| <b>Cx</b> | <b>-17.8867</b>    | 1.4     |      | 1.00  | 0.02  | 0.05  | 0.07  | -0.12 | 0.97  | 0.05  |
| <b>Cy</b> | <b>-167.271</b>    | 2.5     |      |       | 1.00  | 0.06  | 0.05  | -0.00 | -0.05 | 0.78  |
| <b>K1</b> | <b>0.00964277</b>  | 0.00079 |      |       |       | 1.00  | -0.81 | 0.72  | -0.00 | 0.06  |
| <b>K2</b> | <b>0.810485</b>    | 0.028   |      |       |       |       | 1.00  | -0.96 | 0.05  | 0.02  |
| <b>K3</b> | <b>-10.5078</b>    | 0.32    |      |       |       |       |       | 1.00  | -0.11 | 0.00  |
| <b>P1</b> | <b>0.000107326</b> | 8e-05   |      |       |       |       |       |       | 1.00  | -0.03 |
| <b>P2</b> | <b>5.80442e-05</b> | 8.5e-05 |      |       |       |       |       |       |       | 1.00  |

Table 2. Calibration coefficients and correlation matrix.

# Scale Bars

| <b>Label</b>    | <b>Distance (m)</b> | <b>Error (m)</b>   |
|-----------------|---------------------|--------------------|
| point 1_point 2 | 0.0940316           | 3.15686e-05        |
| point 2_point 3 | 0.134406            | -0.000594499       |
| point 4_point 5 | 0.105727            | 0.000727253        |
| <b>Total</b>    |                     | <b>0.000542624</b> |

Table 3. Control scale bars.

# Digital Elevation Model

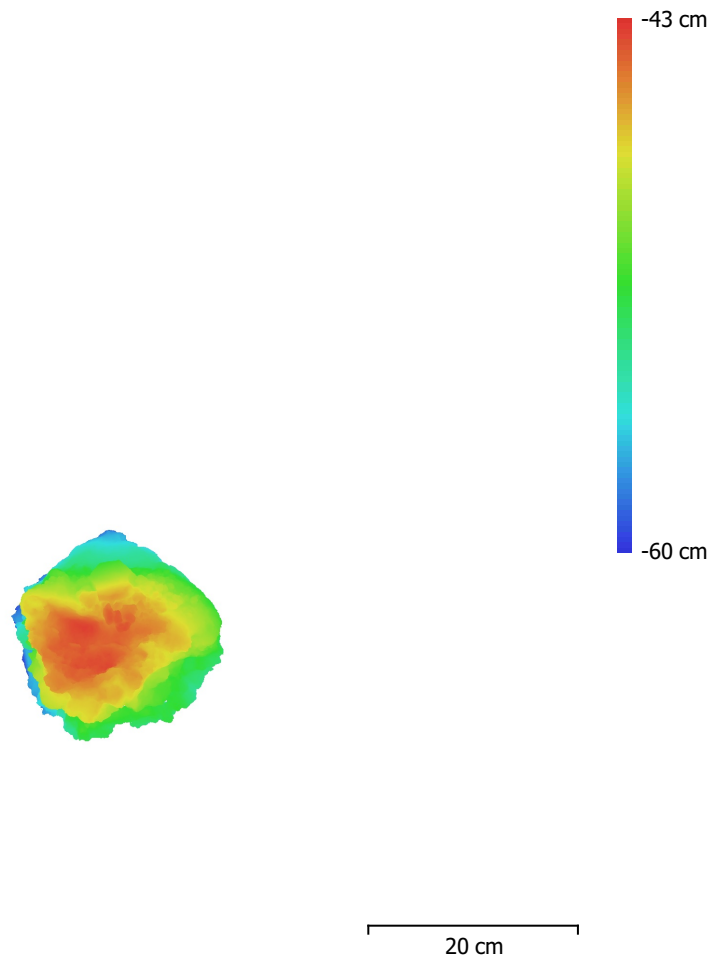

Fig. 3. Reconstructed digital elevation model.

Resolution: unknown  
Point density: unknown



# Processing Parameters

## General

|                   |                       |
|-------------------|-----------------------|
| Cameras           | 97                    |
| Aligned cameras   | 96                    |
| Markers           | 5                     |
| Scale bars        | 3                     |
| Coordinate system | Local Coordinates (m) |
| Rotation angles   | Yaw, Pitch, Roll      |

## Tie Points

|                                |                         |
|--------------------------------|-------------------------|
| Points                         | 61,140 of 409,461       |
| RMS reprojection error         | 0.122815 (0.286662 pix) |
| Max reprojection error         | 0.339792 (1.17151 pix)  |
| Mean key point size            | 2.30569 pix             |
| Point colors                   | 3 bands, uint8          |
| Key points                     | No                      |
| Average tie point multiplicity | 3.20089                 |

## Alignment parameters

|                               |                      |
|-------------------------------|----------------------|
| Accuracy                      | High                 |
| Generic preselection          | Yes                  |
| Reference preselection        | No                   |
| Key point limit               | 60,000               |
| Key point limit per Mpx       | 1,000                |
| Tie point limit               | 0                    |
| Filter points by mask         | Yes                  |
| Mask tie points               | No                   |
| Exclude stationary tie points | Yes                  |
| Guided image matching         | No                   |
| Adaptive camera model fitting | No                   |
| Matching time                 | 4 minutes 34 seconds |
| Matching memory usage         | 1.11 GB              |
| Alignment time                | 2 minutes 3 seconds  |
| Alignment memory usage        | 567.46 MB            |

## Optimization parameters

|                               |                          |
|-------------------------------|--------------------------|
| Parameters                    | f, cx, cy, k1-k3, p1, p2 |
| Adaptive camera model fitting | No                       |
| Optimization time             | 2 seconds                |
| Date created                  | 2023:05:15 16:04:13      |
| Software version              | 2.0.0.15597              |
| File size                     | 22.58 MB                 |

## Depth Maps

|       |    |
|-------|----|
| Count | 96 |
|-------|----|

## Depth maps generation parameters

|                  |                     |
|------------------|---------------------|
| Quality          | High                |
| Filtering mode   | Mild                |
| Max neighbors    | 16                  |
| Processing time  | 1 hours 0 minutes   |
| Memory usage     | 4.48 GB             |
| Date created     | 2023:05:18 15:33:57 |
| Software version | 2.0.0.15597         |
| File size        | 419.42 MB           |

## Point Cloud

|                                          |                                         |
|------------------------------------------|-----------------------------------------|
| Points                                   | 17,139,046                              |
| <b>Point attributes</b>                  |                                         |
| Position                                 |                                         |
| Color                                    | 3 bands, uint8                          |
| Normal                                   |                                         |
| Confidence                               |                                         |
| <b>Point classes</b>                     |                                         |
| Created (never classified)               | 17,139,046                              |
| <b>Depth maps generation parameters</b>  |                                         |
| Quality                                  | High                                    |
| Filtering mode                           | Mild                                    |
| Max neighbors                            | 16                                      |
| Processing time                          | 1 hours 0 minutes                       |
| Memory usage                             | 4.48 GB                                 |
| <b>Point cloud generation parameters</b> |                                         |
| Processing time                          | 32 minutes 32 seconds                   |
| Memory usage                             | 8.05 GB                                 |
| Date created                             | 2023:05:18 16:06:30                     |
| Software version                         | 2.0.0.15597                             |
| File size                                | 310.92 MB                               |
| <b>Model</b>                             |                                         |
| Faces                                    | 10,043,564                              |
| Vertices                                 | 5,023,449                               |
| Vertex colors                            | 3 bands, uint8                          |
| <b>Depth maps generation parameters</b>  |                                         |
| Quality                                  | High                                    |
| Filtering mode                           | Mild                                    |
| Max neighbors                            | 16                                      |
| Processing time                          | 1 hours 0 minutes                       |
| Memory usage                             | 4.48 GB                                 |
| <b>Point cloud generation parameters</b> |                                         |
| Processing time                          | 32 minutes 32 seconds                   |
| Memory usage                             | 8.05 GB                                 |
| <b>Reconstruction parameters</b>         |                                         |
| Surface type                             | Arbitrary                               |
| Source data                              | Point cloud                             |
| Interpolation                            | Enabled                                 |
| Strict volumetric masks                  | No                                      |
| Processing time                          | 6 minutes 14 seconds                    |
| Memory usage                             | 4.02 GB                                 |
| Date created                             | 2023:05:18 16:37:02                     |
| Software version                         | 2.0.0.15597                             |
| File size                                | 229.90 MB                               |
| <b>System</b>                            |                                         |
| Software name                            | Agisoft Metashape Professional          |
| Software version                         | 2.0.0 build 15597                       |
| OS                                       | Windows 64 bit                          |
| RAM                                      | 63.90 GB                                |
| CPU                                      | Intel(R) Core(TM) i7-7700 CPU @ 3.60GHz |
| GPU(s)                                   | Quadro M4000                            |

## 8 References

Balco, G., Stone, J. O., Lifton, N. A. and Dunai, T. J.: A complete and easily accessible means of calculating surface exposure ages or erosion rates from  $^{10}\text{Be}$  and  $^{26}\text{Al}$  measurements, *Quat. Geochronol.*, 3(3), 174–195, doi:10.1016/j.quageo.2007.12.001, 2008.

Leménager, M., Burkiewicz, J., Schoen, D. J. and Joly, S.: Studying flowers in 3D using photogrammetry, *New Phytol.*, 237(5), 1922–1933, doi:10.1111/nph.18553, 2023.

Lifton, N., Sato, T. and Dunai, T. J.: Scaling in situ cosmogenic nuclide production rates using analytical approximations to atmospheric cosmic-ray fluxes, *Earth Planet. Sci. Lett.*, 386, 149–160, doi:10.1016/j.epsl.2013.10.052, 2014.

Luhmann, T.: Close range photogrammetry for industrial applications, *J. Photogramm. Remote Sens.*, 65(6), 558–569, doi:10.1016/j.isprsjprs.2010.06.003, 2010.

Mohren, J., Binnie, S. A., Rink, G. M., Knödgen, K., Miranda, C., Tilly, N. and Dunai, T. J.: A photogrammetry-based approach for soil bulk density measurements with an emphasis on applications to cosmogenic nuclide analysis, *Earth Surf. Dyn.*, 8(4), 995–1020, doi:10.5194/esurf-8-995-2020, 2020b.

Over, J.-S. R., Ritchie, A. C., Kranenburg, C. J., Brown, J. A., Buscombe, D. D., Noble, T., Sherwood, C. R., Warrick, J. A. and Wernette, P. A.: Processing coastal imagery with Agisoft Metashape Professional Edition, version 1.6—Structure from Motion Workflow Documentation, Open-File Report, doi:10.3133/ofr20211039, 2021.

Vermeesch, P., Balco, G., Blard, P.-H., Dunai, T. J., Kober, F., Niedermann, S., Shuster, D. L., Strasky, S., Stuart, F. M., Wieler, R. and Zimmermann, L.: Interlaboratory comparison of cosmogenic  $^{21}\text{Ne}$  in Quartz, *Quat. Geochronol.*, 26, 20–28, doi:10.1016/j.quageo.2012.11.009, 2015.
